# Supplementary material for: Ectopic Expression of a Salt-Inducible Gene, LcSAIN3, from Sheepgrass Improves Seed Germination and Seedling Growth under Salt Stress in Arabidopsis
Source: Genes (Basel). 2021 Dec 16;12(12):1994. doi: 10.3390/genes12121994 (PMC8701343; doi:10.3390/genes12121994)

Figure S1

|         |                                                                                                                                           |     |
|---------|-------------------------------------------------------------------------------------------------------------------------------------------|-----|
| LcSAIN1 | .....MICA <del>VA</del> EVAGALV <del>VG</del> ESGMDGS <del>VN</del> CL <del>VP</del> .                                                    | 28  |
| LcSAIN2 | .....MGDVSTIQRPPTAAKQGDQV <del>GE</del> LV <del>SAG</del> WTNDS <del>SH</del> DMYISS                                                      | 40  |
| LcSAIN3 | MARCAAMATGVMPLMCCLPLLPCSKRWPPVWSFCPPPWRRWEDD <del>GS</del> DVSSSNKHAGVPD                                                                  | 60  |
| LcSAIN1 | .VLQ <del>VR</del> PHLL <del>LC</del> FDG.....LRG.....DGD <del>VE</del> KMWVSSRRRLVSS                                                     | 64  |
| LcSAIN2 | MEASFMQRLRGQH <del>HH</del> HAAADRNMTHVG.....AGHGLKSHQ <del>QGA</del> SDNVSRSS                                                            | 86  |
| LcSAIN3 | RDTQ <del>VI</del> SFLSS <del>CH</del> GGGEGGGGRSLRG <del>FE</del> VFWCATPSDERFWR <del>CG</del> SLPRI <del>WW</del> RTSSSLTLV             | 120 |
| LcSAIN1 | SFSLV <del>LDD</del> .ER <del>WR</del> LLKLH <del>FS</del> HGCDVS.....GRGPASSIS <del>PVT</del> V <del>LV</del> EGRP <del>LS</del>         | 110 |
| LcSAIN2 | RDVGARGL <del>PE</del> DPWARRFK <del>PR</del> DSVMNRR.....GDGVGAS <del>DG</del> ....ESGTDTV                                               | 129 |
| LcSAIN3 | AVTV <del>VEL</del> .LR <del>WI</del> HWK <del>LDD</del> ADGVRQHRRRWI <del>WRS</del> AGAHVGRWPASS <del>DE</del> PLYPLA <del>EW</del> RHSS | 179 |
| LcSAIN1 | FLPASV <del>PK</del> .GRQFQPQLGGRSLQV <del>LQL</del> WRP <del>RR</del> TKWSVPGAGAIQSEEMLLG <del>TR</del> SRFLVLV                          | 169 |
| LcSAIN2 | HVTAPT <del>PKH</del> GRGVNSCVG...GNLVEKTSEVSGQH <del>FE</del> DEVHSAAQVSK <del>SK</del> KRRPASS                                          | 185 |
| LcSAIN3 | FLPASMPK.GRQYCFWIR...VHGMVSWRSRRTKWPCLRR...RRDWFHSGTVSDLI <del>AIL</del>                                                                  | 232 |
| LcSAIN1 | RGPF <del>CIS</del> QGLCS <del>FQ</del> FL <del>LG</del> FLVKCTAPTF                                                                       | 198 |
| LcSAIN2 | .....TAAGSFISMFGDKRW.....                                                                                                                 | 200 |
| LcSAIN3 | .....VCN <del>FL</del> EVL <del>GP</del> DVICVFMSI                                                                                        | 251 |

Figure S2

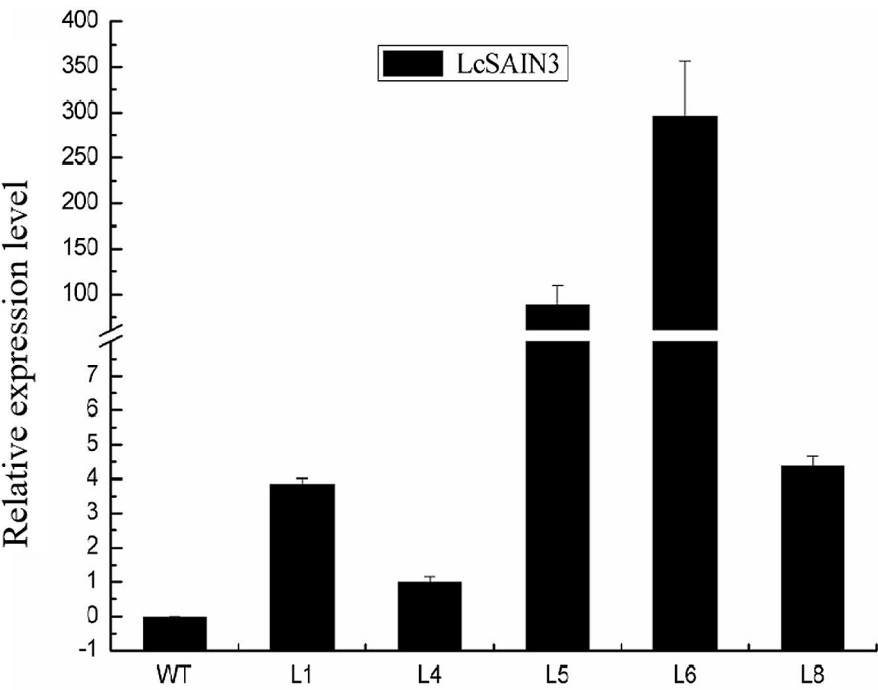

Supplement: Supplementary file 1 [file genes-12-01994-s001.zip › genes-1460833-supplementary.pdf]
